# Supplementary material
Source: publisher figshare collection journal article supplement (https://gsajournals.figshare.com/articles/dataset/_/7335188)
Supplement: Supplementary file 2 [file 1]

Figure S3.

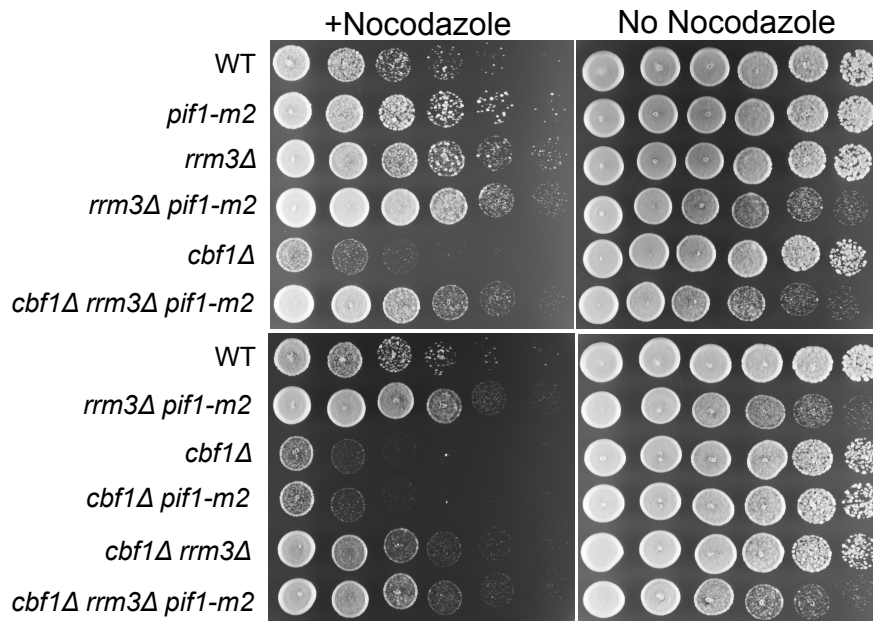

Figure S3. Strains of the indicated genotype were spotted in 5-fold serial dilutions on YEPD plates containing no or 10  $\mu$ g/ml nocodazole.
