# Supplementary material
Source: publisher figshare collection journal article supplement (https://gsajournals.figshare.com/articles/dataset/_/7335188)
Supplement: Supplementary file 3 [file 1]

Figure S2.

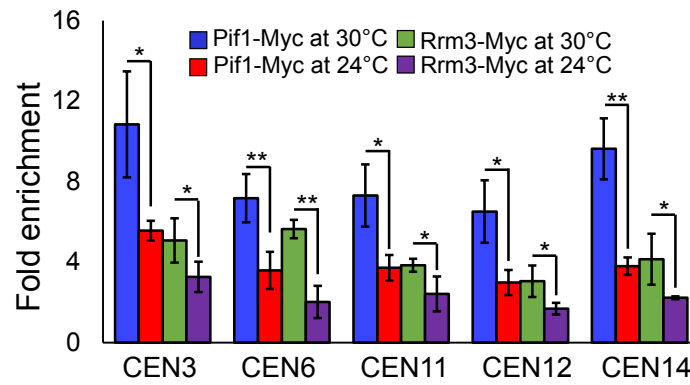

Figure S2. Pif1 and Rrm3 bindings to CEN3, 6, 11, 12 and 14 in asynchronous cells at 30°C (blue and green colors) and 24°C (red and purple colors). \* indicates  $p$  value < 0.05; \*\* indicates  $p$  value < 0.01.
