# Supplementary material
Source: publisher figshare collection journal article supplement (https://gsajournals.figshare.com/articles/dataset/_/7335188)

Figure S1.

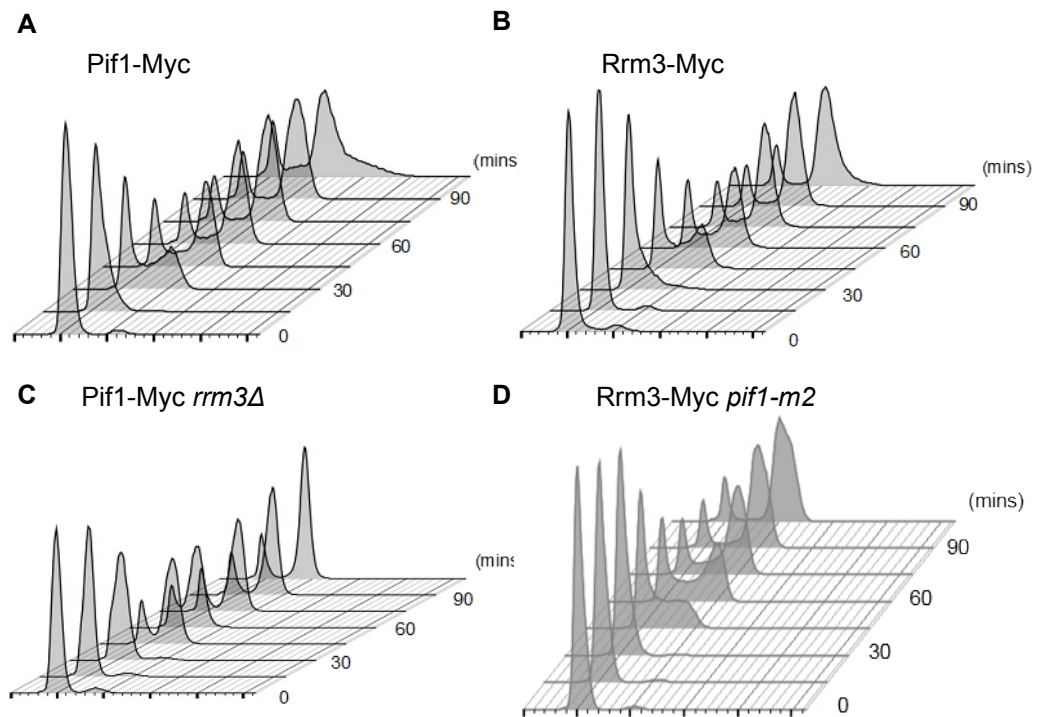

Figure S1. A-D representative FACS data for experiments in Fig. 3.

Supplement: Supplementary file 1 [file 1]
